# Supplementary material for: The Positive Effect of 6-Gingerol on High-Fat Diet and Streptozotocin-Induced Prediabetic Mice: Potential Pathways and Underlying Mechanisms
Source: MDPI journal article supplement (doi:10.3390/nu15040824), 2023-02-06
Supplement: s1 [file s1]

Table S1. Ingredients and energy densities of experimental diets.

| Ingredients           | D12450J |       | D12492 |       |
|-----------------------|---------|-------|--------|-------|
|                       | g%      | kcal% | g%     | kcal% |
| Casein                | 0.190   | 0.198 | 0.258  | 0.198 |
| L-cystine             | 0.003   | 0.003 | 0.004  | 0.003 |
| Sucrose               | 0.336   | 0.351 | 0.094  | 0.072 |
| Corn starch           | 0.299   | 0.312 | -      | -     |
| Lodex 10 sugar        | 0.033   | 0.035 | 0.162  | 0.124 |
| Cellulose             | 0.047   | 0.000 | 0.065  | 0.000 |
| Soybean oil           | 0.024   | 0.056 | 0.032  | 0.056 |
| Lard                  | 0.019   | 0.045 | 0.317  | 0.547 |
| Mineral mixture       | 0.047   | 0.000 | 0.065  | 0.000 |
| Hydrocholine tartrate | 0.002   | 0.000 | 0.003  | 0.000 |
| Vitamin mixture       | 0.001   | 0.000 | 0.001  | 0.000 |
| Dye                   | 0.000   | 0.000 | 0.000  | 0.000 |
| Energy (kcal/g diet)  | 3.82    |       | 5.21   |       |

Table S2. The primary sequence used for quantitative real-time polymerase chain reaction.

| Gene           | Forward                 | Reverse                 |
|----------------|-------------------------|-------------------------|
| PI3K (p110)    | GGAGGCTGAATCTCTTGACCTG  | TTACCCACCGTGCTCTGCTG    |
| AKT            | CGTGTGGCAAGATGTGTATGAG  | GTGATGGTGATCATCTGAGCTGT |
| GK             | TGGCCTAATGAAAGCTGGGG    | AGCACCTGTTCATACGTG      |
| PEPCK          | GGATGTGGCCAGGATCGAAA    | ATACATGGTGCGGCCTTTCA    |
| G6P            | AATGAACGTGCTCCACGACT    | CTGCCACCCAGAGGAGATTG    |
| Keap           | CTTCGGGGAGGAGGAGTTCT    | GGGCAGTCGTATTTGACCCA    |
| Nrf2           | CCATTTGGGCTAGTTTCTGTGTA | AGTTTGCTTTTAGCCAGATGTCA |
| $\beta$ -actin | GGTCAGAAGGACTCCTAT      | TGTCGTCCCAGTTGGTAACA    |

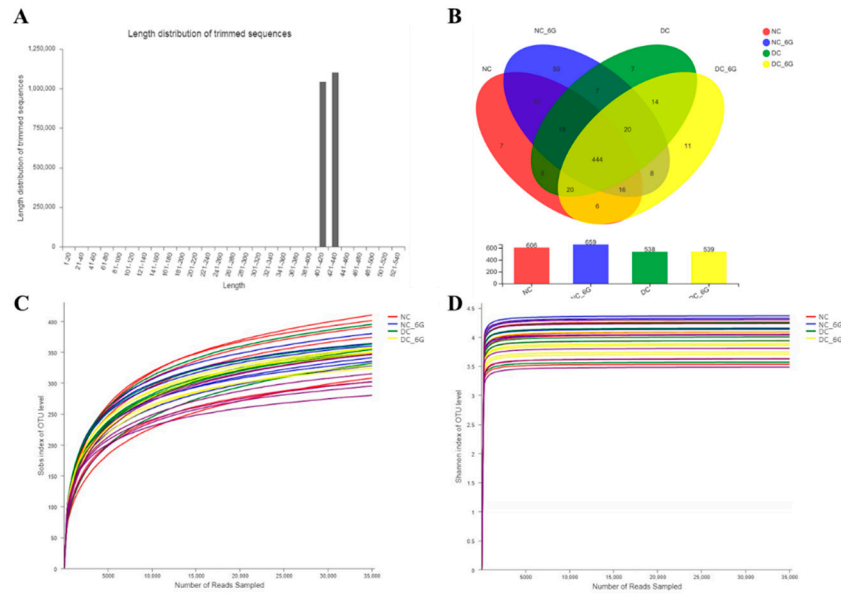

Figure S1. DNA raw data and comparison of the OTUs of intestinal bacteria of mice (A) DNA sequencing number and length; (B) A Venn diagram was generated to describe the common and unique OTUs among the 4 groups; (C) The rarefaction curves; (D) The shannon curves of samples. NC, normal control group; NC+6G, normal mice treated with 6-gingerol; DC, prediabetic control group; DC+6G, prediabetic mice treated with 6-gingerol.
